# Supplementary material for: Drinking Citrus Fruit Juice Inhibits Vascular Remodeling in Cuff-Induced Vascular Injury Mouse Model
Source: PubMed Central journal article supplement (PMC4334235; doi:10.1371/journal.pone.0117616), 2015-02-18
Supplement: pone.0117616.s001.pdf [file pone.0117616.s001.pdf]

|                       | C              |                | 10% CU         |                | 40% CU         |                | 10% CI         |                | 40% CI         |               |
|-----------------------|----------------|----------------|----------------|----------------|----------------|----------------|----------------|----------------|----------------|---------------|
| Treatment             | Before         | After          | Before         | After          | Before         | After          | Before         | After          | Before         | After         |
| Body Weight (g)       | 22.4<br>±0.7   | 24.0<br>±0.7   | 22.6<br>±0.8   | 24.2<br>±1.2   | 23.2<br>±0.6   | 24.7<br>±0.8   | 22.7<br>±0.5   | 24.5<br>±0.8   | 23.4<br>±0.9   | 24.4<br>±0.9  |
| Blood Glucose (mg/dL) | 185.3<br>±23.9 | 174.8<br>±30.0 | 161.0<br>±13.6 | 155.8<br>±21.5 | 173.5<br>±24.3 | 175.2<br>±18.0 | 138.3<br>±26.6 | 171.2<br>±27.5 | 173.2<br>±38.2 | 157.7<br>±6.1 |
| Blood Pressure (mmHg) | 104.7<br>±6.4  | 101.8<br>±11.8 | 92.8<br>±6.9   | 118.2<br>±14.4 | 96.8<br>±6.9   | 100.8<br>±7.7  | 92.3<br>±2.6   | 104.2<br>±5.3  | 100.5<br>±12.0 | 101.8<br>±9.8 |
