# Supplementary material for: Drinking Citrus Fruit Juice Inhibits Vascular Remodeling in Cuff-Induced Vascular Injury Mouse Model
Source: PubMed Central journal article supplement (PMC4334235; doi:10.1371/journal.pone.0117616), 2015-02-18

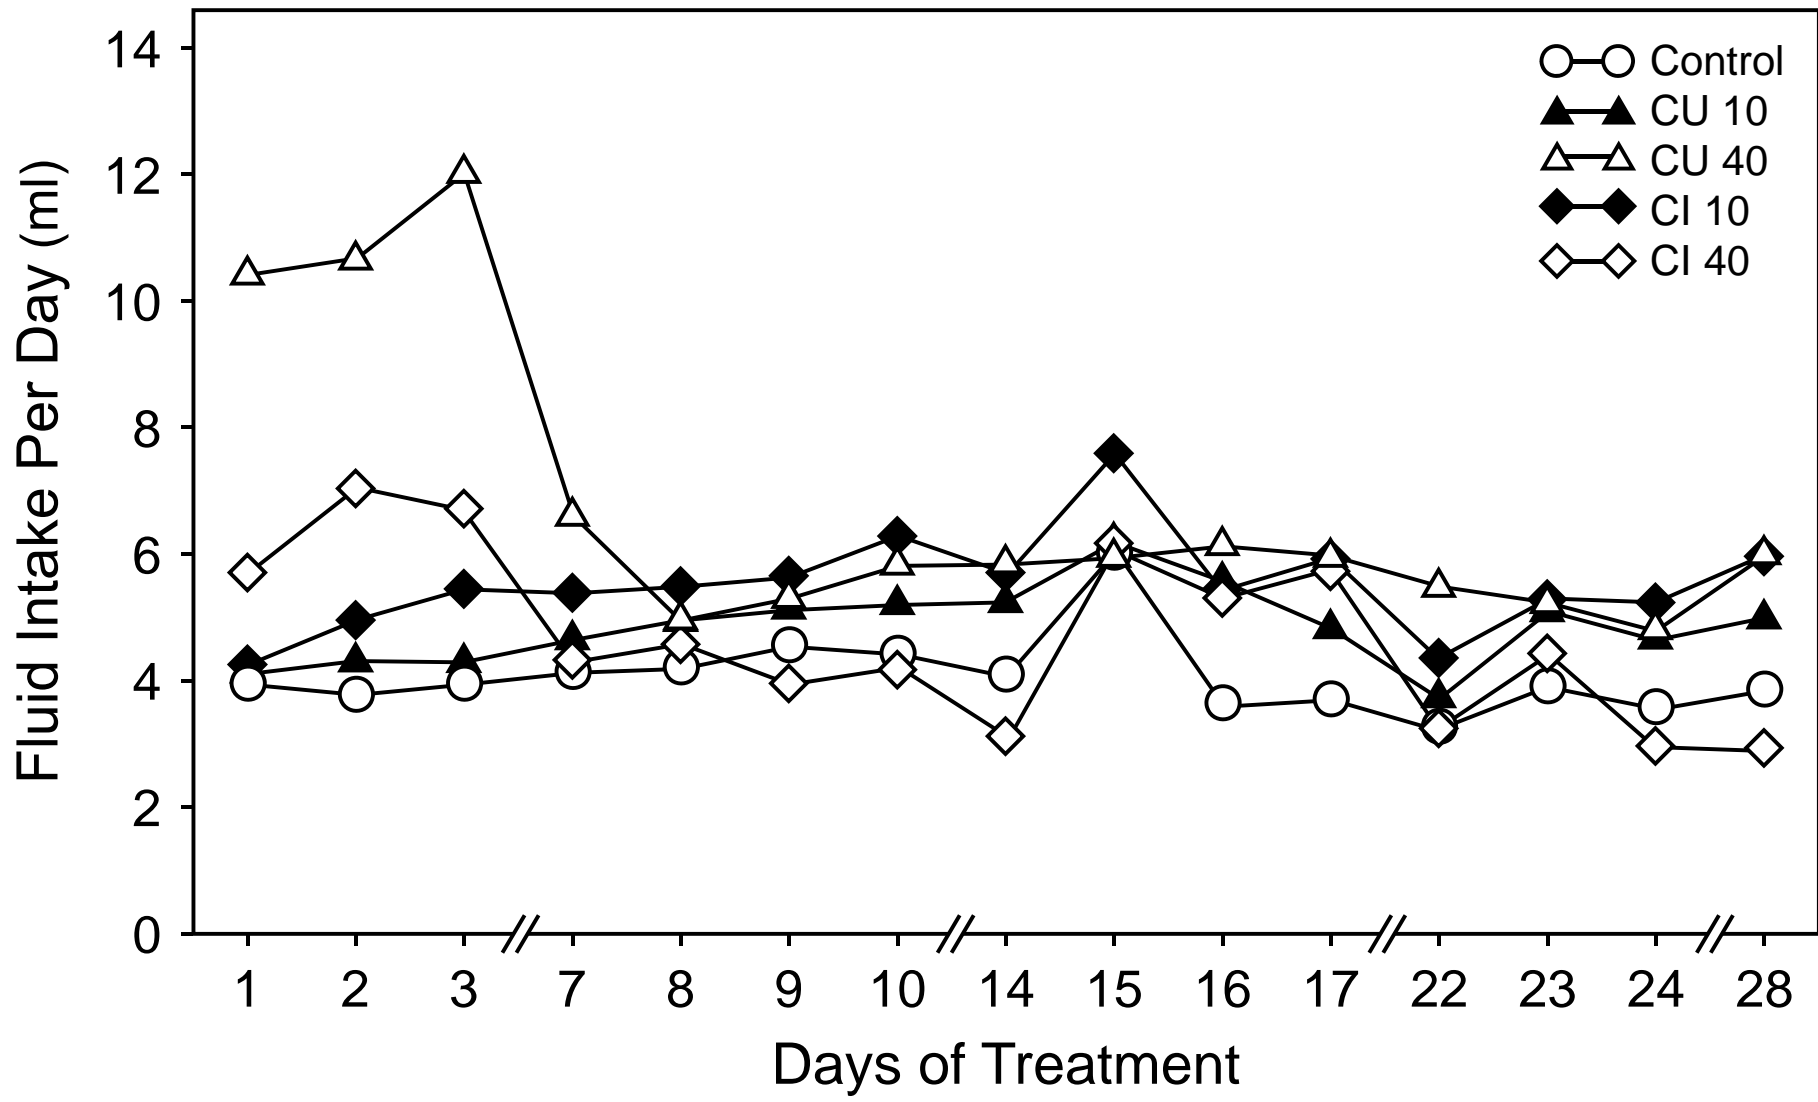

Supplement: pone.0117616.s002.pdf [file pone.0117616.s002.pdf]
